# Supplementary material for: Synthesis and properties investigation of hydroxyl functionalized polyisoprene prepared by cobalt catalyzed co-polymerization of isoprene and hydroxylmyrcene
Source: Royal Society of Chemistry journal article supplement (doi:10.1039/c9py01808e), 2020-01-01
Supplement: c9py01808e1.pdf [file c9py01808e1.pdf]

# Synthesis and properties investigation of hydroxyl functionalized polyisoprene prepared by cobalt catalyzed co-polymerization of isoprene and hydroxylmyrcene

Yuechao Xu<sup>a</sup>, Junyi Zhao<sup>a,b,c</sup>, Qiao Gan<sup>a</sup>, Weilun Ying<sup>a</sup>, Zhonghan Hu<sup>a</sup>, Fuming Tang<sup>a</sup>, Wanwei Luo<sup>a</sup>, Yunjie Luo<sup>a</sup>, Zhongbao Jian,<sup>d</sup> Dirong Gong<sup>a,d\*</sup>

<sup>a</sup> State Key Laboratory Base of Novel Functional Materials and Preparation Science, Ningbo Key Laboratory of Specialty Polymers, Faculty of Materials Science and Chemical Engineering, Ningbo University, Ningbo 315211, P. R. China.

<sup>b</sup> Key Laboratory of Urban Environment and Health, Institute of Urban Environment, Chinese Academy of Sciences, No. 1799, Jimei Road, Xiamen, Fujian 361021, PR China

<sup>c</sup> Ningbo Urban Environment Observation and Research Station-NUEORS, Chinese Academy of Sciences, Ningbo, Zhejiang 315830, PR China

<sup>d</sup> State Key Laboratory of Polymer Physics and Chemistry, Changchun Institute of Applied Chemistry, Chinese Academy of Sciences, Changchun 130022, China

\*Corresponding author. Email: [Gongdirong@nbu.edu.cn](mailto:Gongdirong@nbu.edu.cn)

## Supporting Information Content List

**Figure 1S** The  $^1\text{H}$  NMR spectrum of ligand

**Figure 2S** The  $^{13}\text{C}$  NMR spectrum of ligand

**Figure 3S** The  $^{31}\text{P}$  NMR spectrum of ligand

**Figure 4S** The  $^1\text{H}$  NMR spectra of the **Co1** complex

**Figure 5S** The mass spectrum of the **Co1** complex

**Figure 6S** The  $^1\text{H}$  NMR spectra of Poly(IP-co-My-OH)s (a): run 1, table 1, (b) run 6, table 1, (c) run 8, table 1 and (d) run 7, table 1

**Figure 7S** The  $^1\text{H}$  NMR spectra of (a) polyisoprene, (b) poly(isoprene<sub>95.6</sub>-co-My-OH<sub>4.4</sub>), (c) poly(isoprene<sub>91.4</sub>-co-My-OH<sub>8.6</sub>), (d) poly(isoprene<sub>83.7</sub>-co-My-OH<sub>16.3</sub>), (e) poly(isoprene<sub>73.0</sub>-co-My-OH<sub>27.0</sub>) and (f) poly(isoprene<sub>68.5</sub>-co-My-OH<sub>31.5</sub>)

**Figure 8S** The  $^{13}\text{C}$  NMR spectra of (a) polyisoprene, (b) poly(isoprene<sub>95.6</sub>-co-My-OH<sub>4.4</sub>), (c) poly(isoprene<sub>91.4</sub>-co-My-OH<sub>8.6</sub>), (d) poly(isoprene<sub>83.7</sub>-co-My-OH<sub>16.3</sub>), (e) poly(isoprene<sub>73.0</sub>-co-My-OH<sub>27.0</sub>) and (f) poly(isoprene<sub>68.5</sub>-co-My-OH<sub>31.5</sub>) **Figure 9S** AFM topology of poly(IP-co-My-OH)s:

(a) polyisoprene, (b) poly(isoprene<sub>95.6</sub>-co-My-OH<sub>4.4</sub>),

(c) poly(isoprene<sub>91.4</sub>-co-My-OH<sub>8.6</sub>), (d) poly(isoprene<sub>83.7</sub>-co-My-OH<sub>16.3</sub>),

(e) poly(isoprene<sub>73.0</sub>-co-My-OH<sub>27.0</sub>) and (f) poly(isoprene<sub>68.5</sub>-co-My-OH<sub>31.5</sub>)

**Figure 10S** The vulcanization profiles of  $\text{SiO}_2$  reinforced  $\text{SiO}_2$ /PIP composites and  $\text{SiO}_2$ /poly(IP-co-My-OH)s composites

**Figure 11S** The loss storage of  $\text{SiO}_2$  reinforced  $\text{SiO}_2$ /PIP composites and  $\text{SiO}_2$ /poly(IP-co-My-OH)s composites

**Table 1S** The crystal data and structure refinements of complex **Co1·CH<sub>3</sub>OH**

**Table 2S** The summarized properties of  $\text{SiO}_2$  reinforced  $\text{SiO}_2$ /PIP composites and  $\text{SiO}_2$ /poly(IP-co-My-OH)s composites

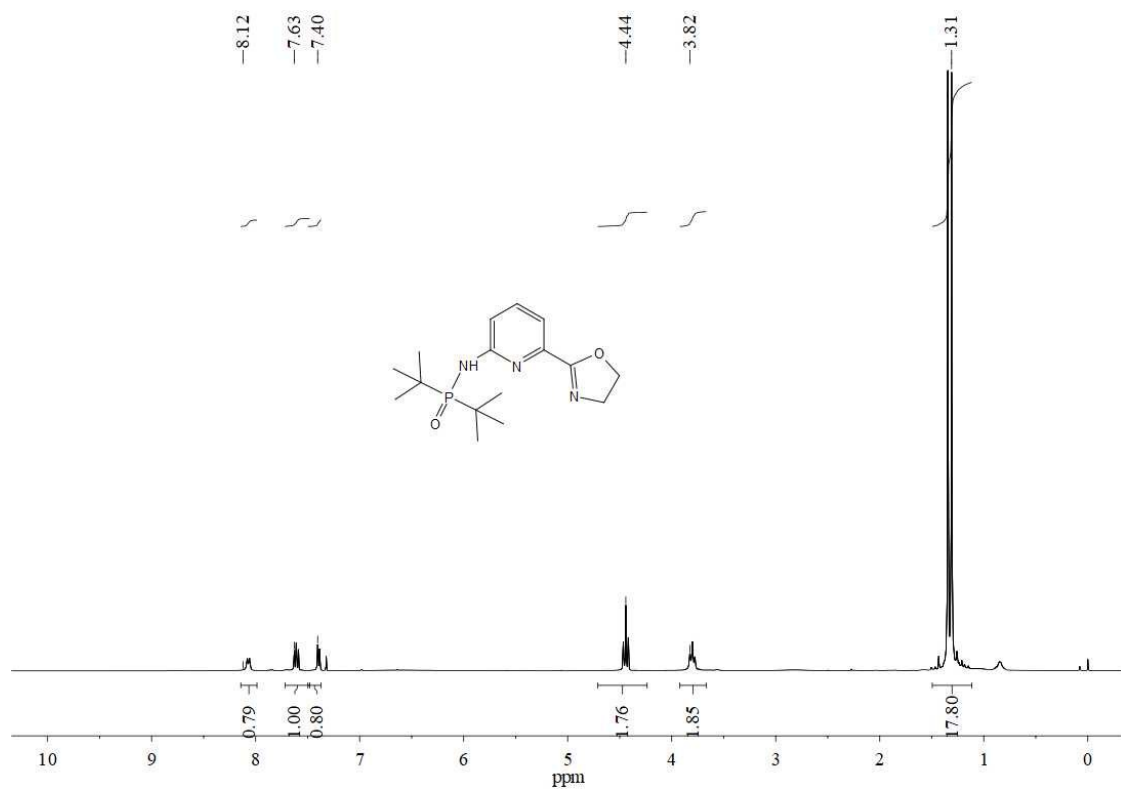

**Figure 1S** The  $^1\text{H}$  NMR spectrum of ligand L1

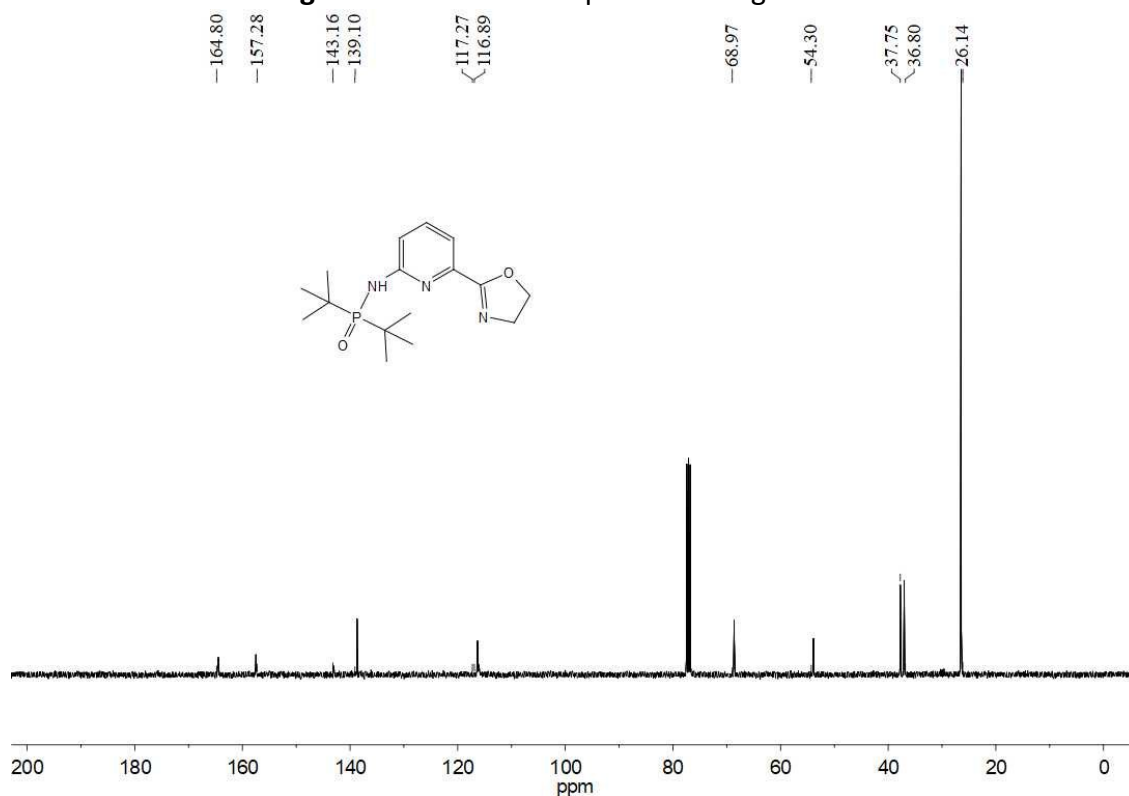

**Figure 2S** The  $^{13}\text{C}$  NMR spectrum of ligand L1

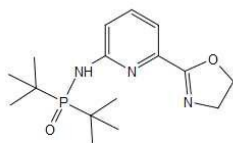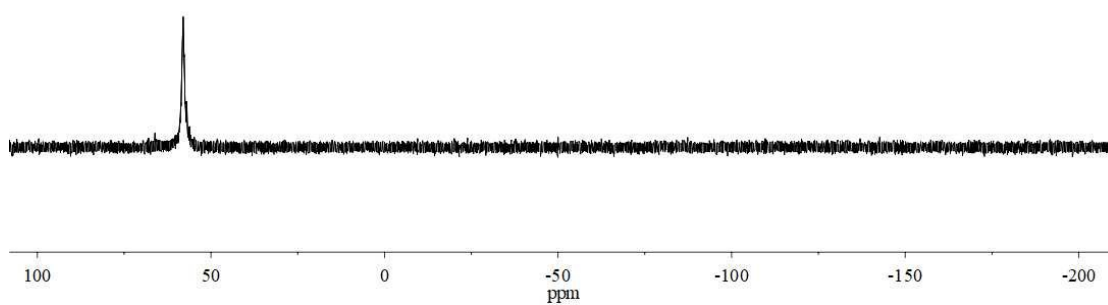

Figure 3S The  $^{31}\text{P}$  NMR spectrum of ligand L1

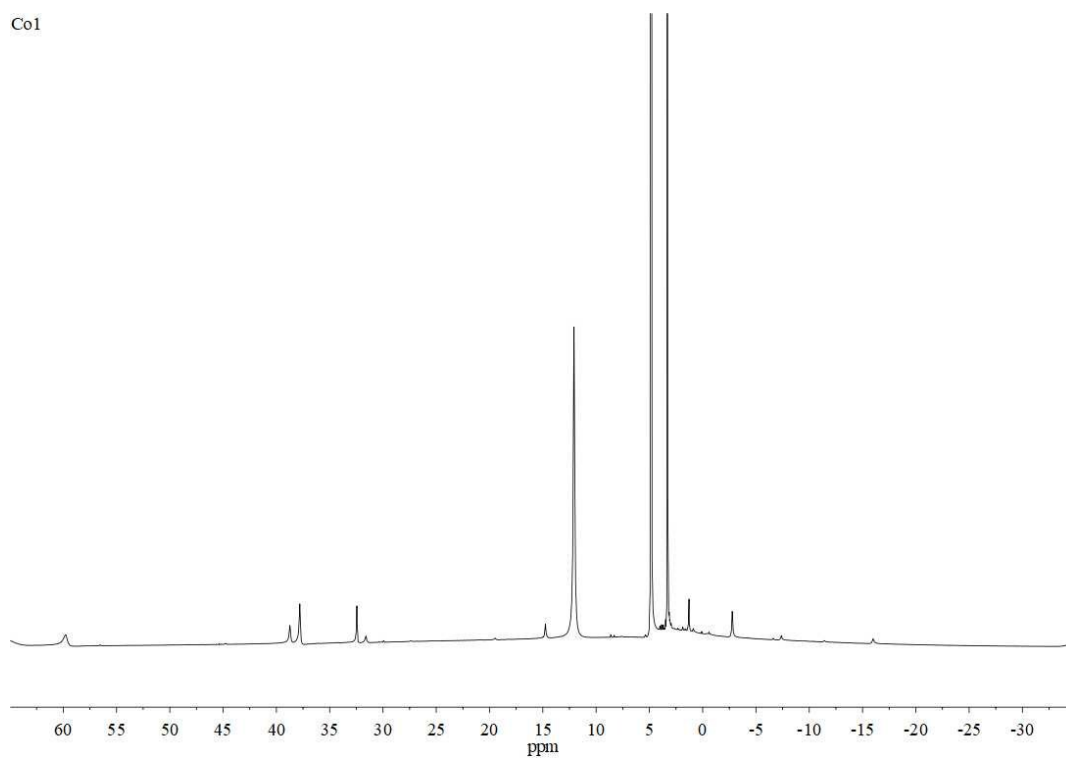

Figure 4S The  $^1\text{H}$  NMR spectrum of the Co1 complex

Generic Display Report (all)

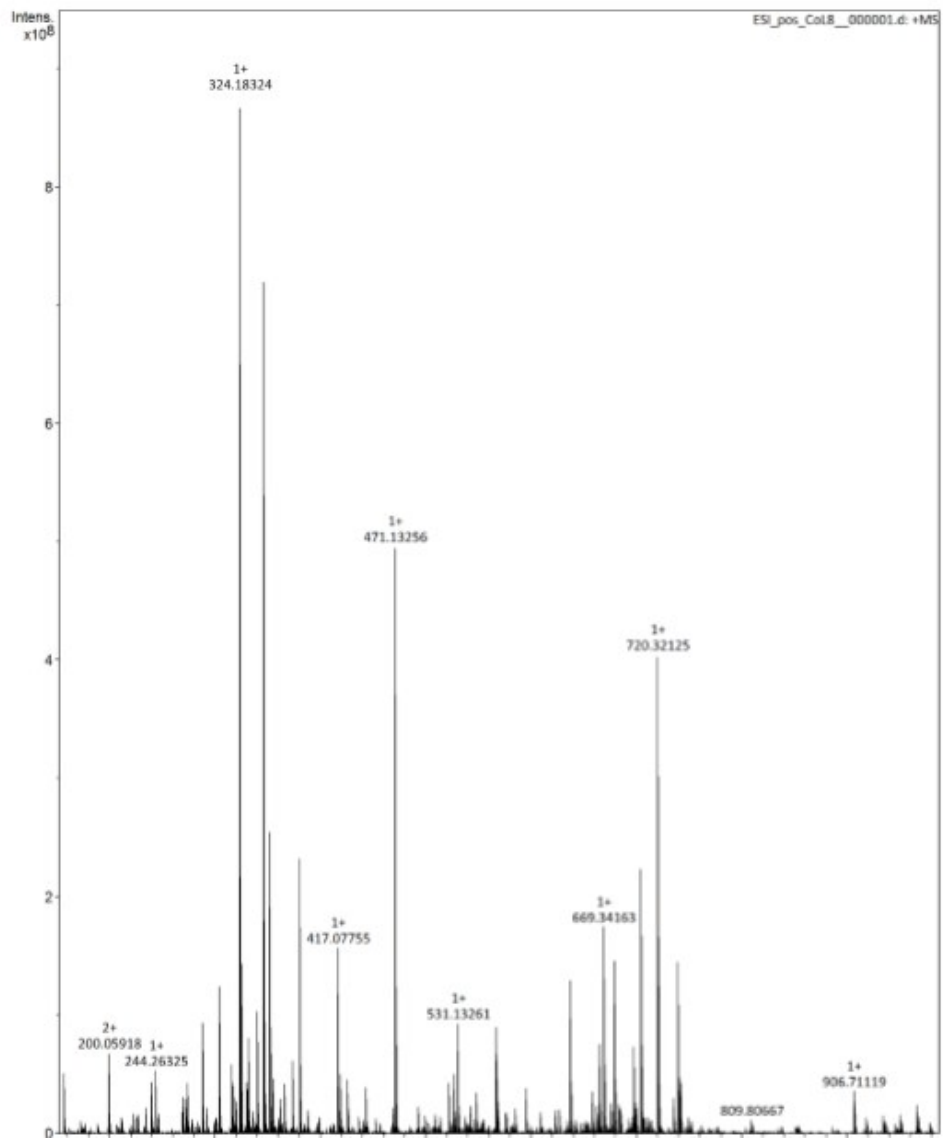

Figure 5S The mass spectra of the Co1 complex

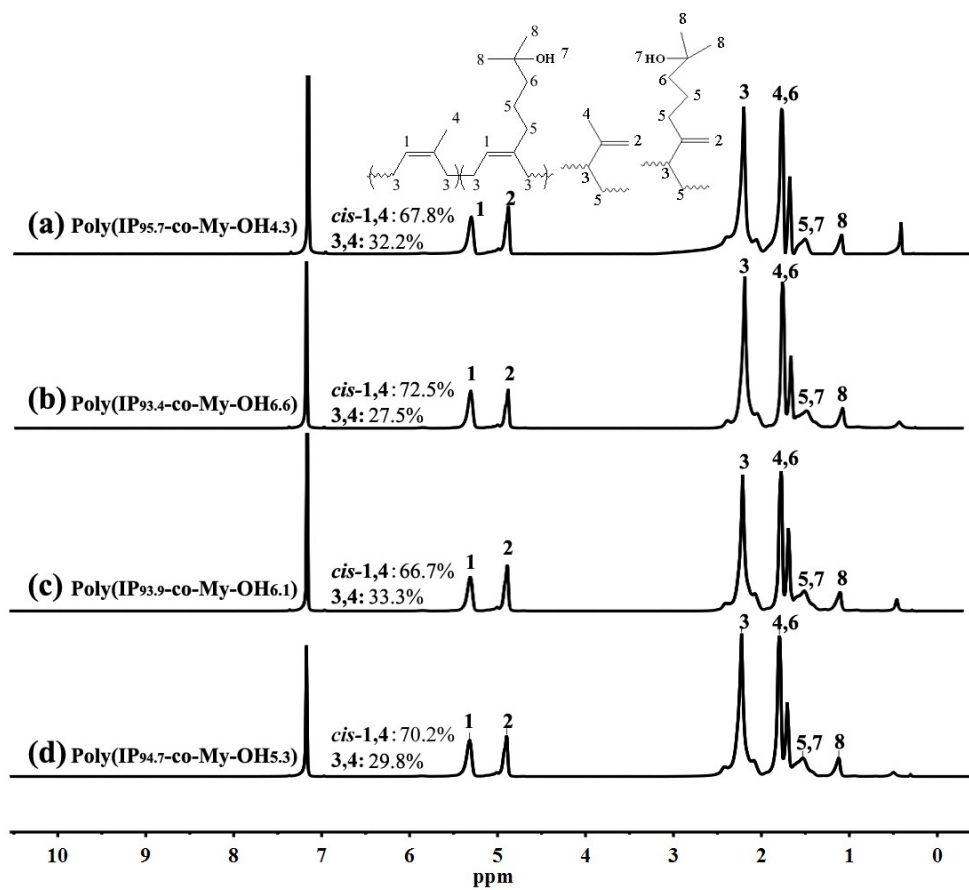

**Figure 6S** The  $^1\text{H}$  NMR spectra of Poly(IP-co-My-OH)s (a): run 1, table 1, (b) run 6, table 1, (c) run 8, table 1 and (d) run 7, table 1

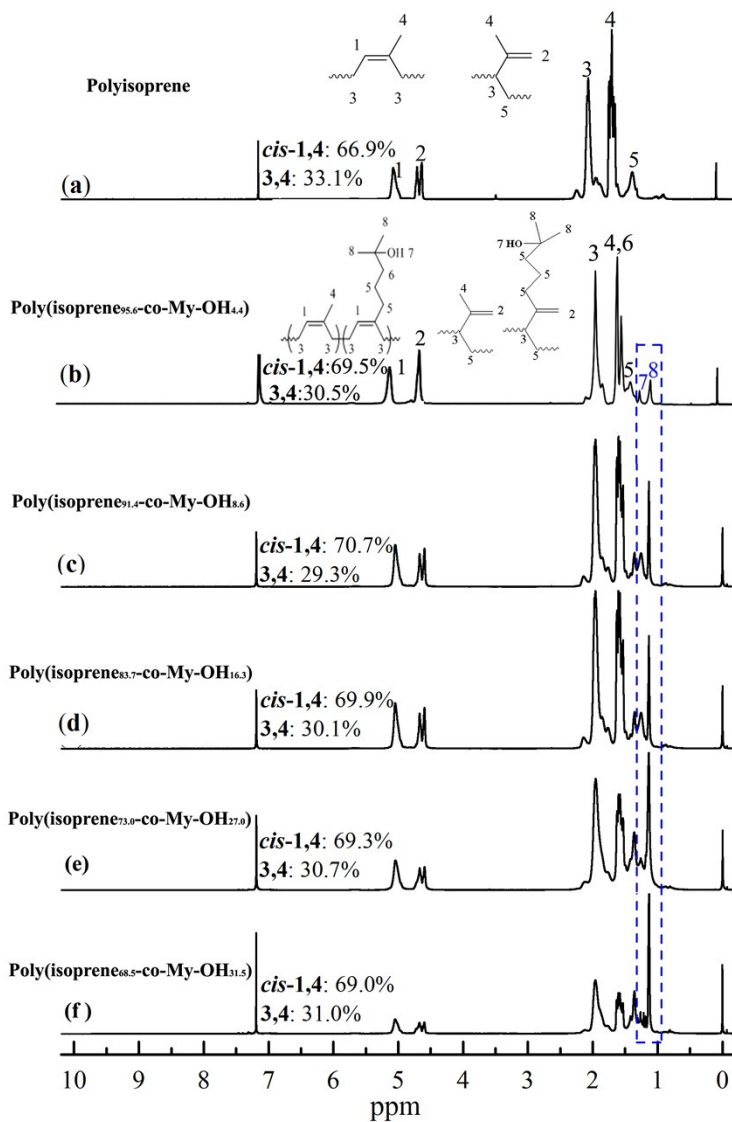

**Figure 7S** The  $^1\text{H}$  NMR spectra of (a) polyisoprene, (b) poly(isoprene<sub>95.6</sub>-co-My-OH<sub>4.4</sub>), (c) poly(isoprene<sub>91.4</sub>-co-My-OH<sub>8.6</sub>), (d) poly(isoprene<sub>83.7</sub>-co-My-OH<sub>16.3</sub>), (e) poly(isoprene<sub>73.0</sub>-co-My-OH<sub>27.0</sub>) and (f) poly(isoprene<sub>68.5</sub>-co-My-OH<sub>31.5</sub>)

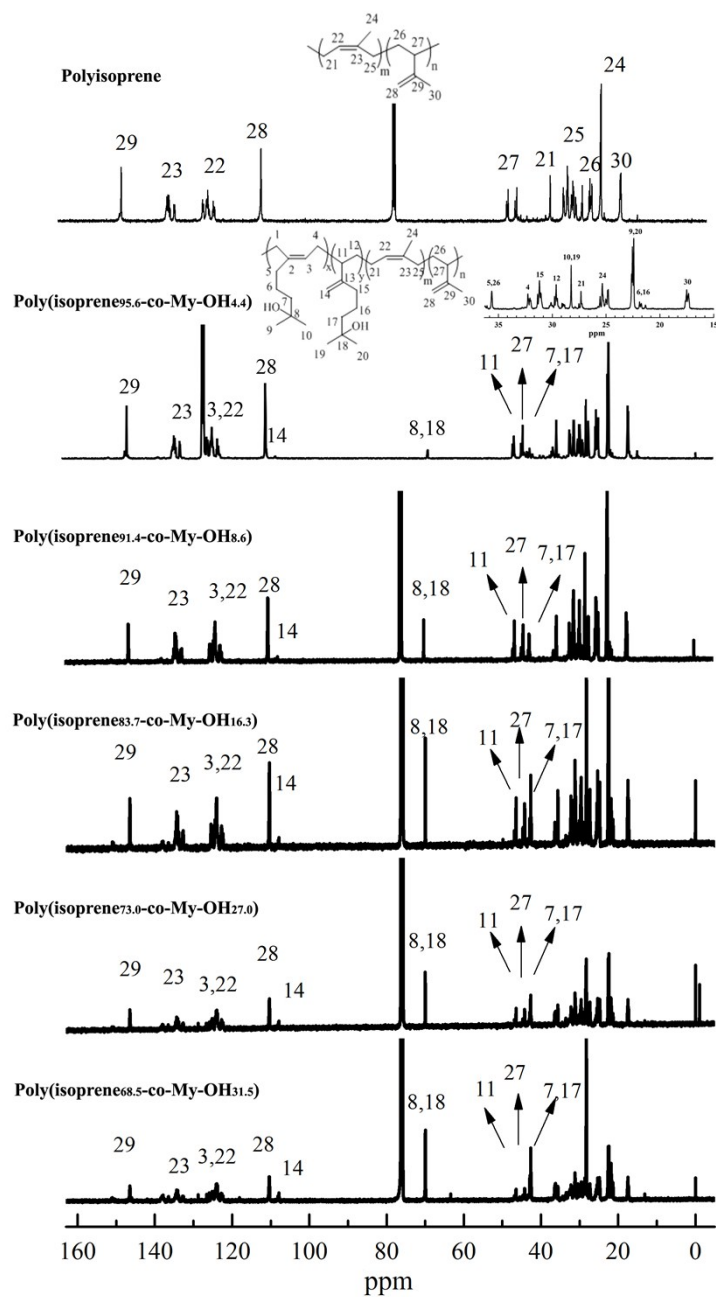

**Figure 8S** The  $^{13}\text{C}$  NMR spectra of (a) polyisoprene, (b) poly(isoprene<sub>95.6</sub>-co-My-OH<sub>4.4</sub>), (c) poly(isoprene<sub>91.4</sub>-co-My-OH<sub>8.6</sub>), (d) poly(isoprene<sub>83.7</sub>-co-My-OH<sub>16.3</sub>), (e) poly(isoprene<sub>73.0</sub>-co-My-OH<sub>27.0</sub>) and (f) poly(isoprene<sub>68.5</sub>-co-My-OH<sub>31.5</sub>)



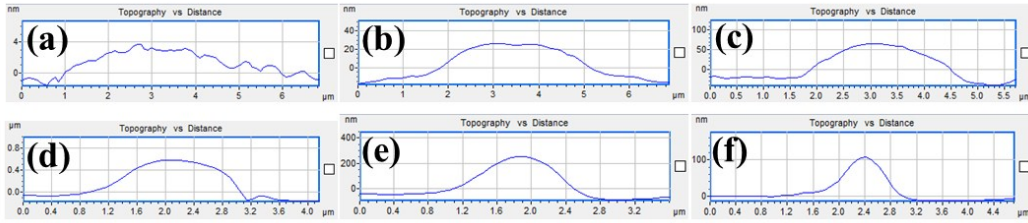

**Figure 9S** AFM topography of poly(IP-co-My-OH)s: (a) polyisoprene, (b) poly(isoprene<sub>95.6</sub>-co-My-OH<sub>4.4</sub>), (c) poly(isoprene<sub>91.4</sub>-co-My-OH<sub>8.6</sub>), (d) poly(isoprene<sub>83.7</sub>-co-My-OH<sub>16.3</sub>), (e) poly(isoprene<sub>73.0</sub>-co-My-OH<sub>27.0</sub>) and (f) poly(isoprene<sub>68.5</sub>-co-My-OH<sub>31.5</sub>)

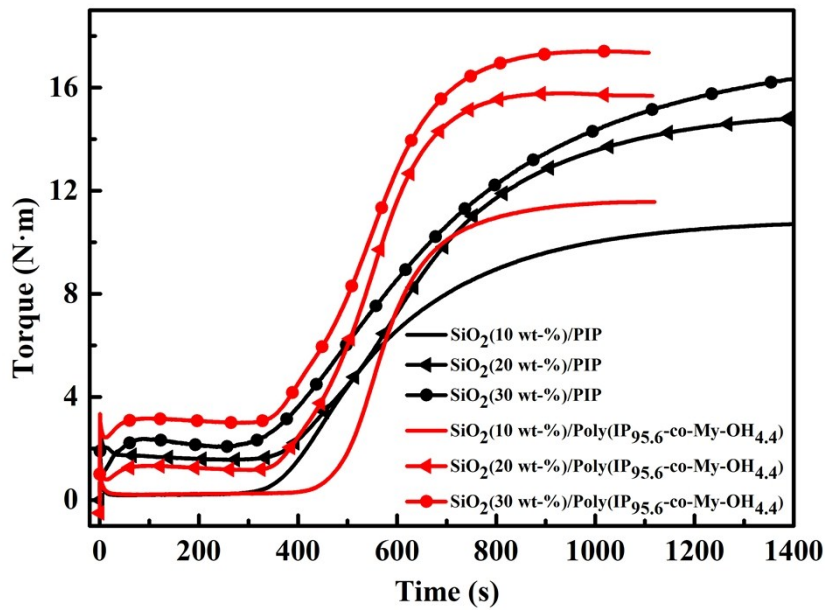

**Figure 10S** The vulcanization profiles of SiO<sub>2</sub> reinforced SiO<sub>2</sub>/PIP composites and SiO<sub>2</sub>/poly(IP-co-My-OH)s composites

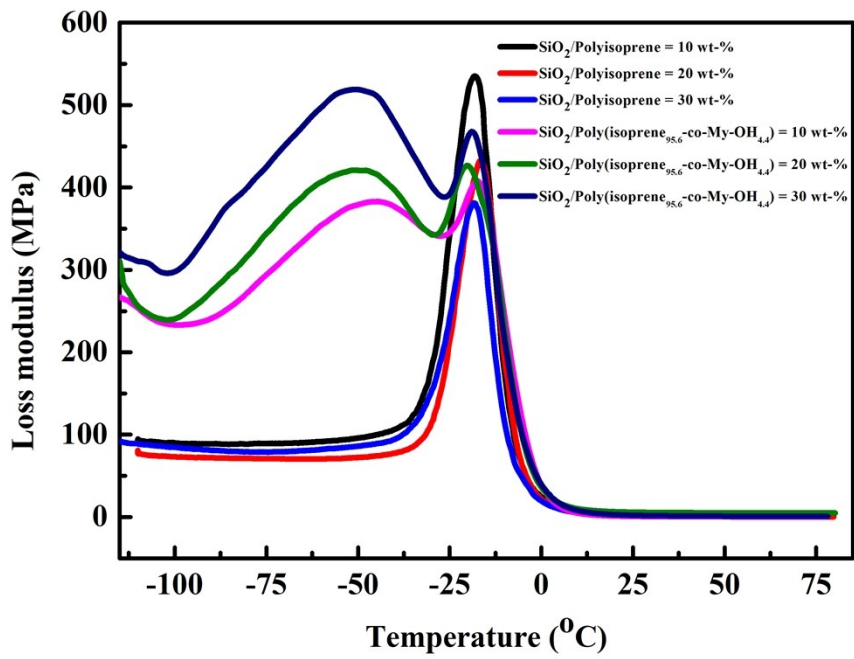

**Figure 11S** The loss storage of SiO<sub>2</sub> reinforced SiO<sub>2</sub>/PIP composites and SiO<sub>2</sub>/poly(IP-co-My-OH)s composites

**Table 1S** Crystal Data and Structure Refinements of Complex **Co1·CH<sub>3</sub>OH**

| <b>Co1·MeOH</b>                         |                                                                                 |
|-----------------------------------------|---------------------------------------------------------------------------------|
| Formula                                 | C <sub>17</sub> H <sub>30</sub> Cl <sub>2</sub> CoN <sub>3</sub> O <sub>2</sub> |
|                                         | P                                                                               |
| Molecular Weight                        | 485.24                                                                          |
| Crystal system                          | monoclinic                                                                      |
| Space group                             | P 121/c1                                                                        |
| a(Å)                                    | 16.5582(3)                                                                      |
| b(Å)                                    | 8.70090(10)                                                                     |
| c(Å)                                    | 16.7290(3)                                                                      |
| α(deg)                                  | 90.00                                                                           |
| β(deg)                                  | 111.858(2)                                                                      |
| γ(deg)                                  | 90.00                                                                           |
| V(Å <sup>3</sup> )                      | 2236.90(7)                                                                      |
| D <sub>calcd</sub> (Mg/m <sup>3</sup> ) | 1.441                                                                           |
| Absorp coeff (mm <sup>-1</sup> )        | 9.073                                                                           |
| F(000)                                  | 1012.0                                                                          |
| Crystal size(mm)                        | 0.14x0.20x0.33                                                                  |
| θ Range (deg)                           | 2.875 to 74.093                                                                 |
| No. Of reflns collected                 | 11707<br>(R <sub>int</sub> = 0.0328)                                            |
| No. of indep reflns                     | 4399                                                                            |
| No. of data/<br>restraint/params        | 4399/3/254                                                                      |
| GOF on F <sub>2</sub>                   | 1.058                                                                           |
| R <sub>1</sub> (I>2sigma(I))            | 0.0354                                                                          |
| wR <sub>2</sub>                         | 0.0881                                                                          |

**Table 2S** The summarized properties of SiO<sub>2</sub> reinforced SiO<sub>2</sub>/PIP composites and SiO<sub>2</sub>/poly(IP-co-My-OH)s composites

| Parameter                         | PIP<br>SiO <sub>2</sub><br>10% | PIP<br>SiO <sub>2</sub><br>20% | PIP<br>SiO <sub>2</sub><br>30% | PIP-MY-<br>OH<br>SiO <sub>2</sub><br>10% | PIP-MY-<br>OH<br>SiO <sub>2</sub><br>20% | PIP-MY-<br>OH<br>SiO <sub>2</sub><br>30% |
|-----------------------------------|--------------------------------|--------------------------------|--------------------------------|------------------------------------------|------------------------------------------|------------------------------------------|
| Optimum cure time, Tc90,(s)       | 920                            | 1015                           | 1033                           | 729                                      | 708                                      | 703                                      |
| Scorch time, Tc10, (s)            | 433                            | 473                            | 464                            | 515                                      | 407                                      | 397                                      |
| Minimum torque, ML, (dNm)         | 0.18                           | 1.23                           | 2.12                           | 0.26                                     | 1.51                                     | 3.05                                     |
| Maximum torque, MH, (dNm)         | 10.55                          | 14.82                          | 16.33                          | 11.35                                    | 15.88                                    | 17.48                                    |
| Cure Rate Index(s <sup>-1</sup> ) | 0.19                           | 0.17                           | 0.17                           | 0.41                                     | 0.31                                     | 0.30                                     |
